# Supplementary material for: An Experimental Kinetics Study of Isopropanol Pyrolysis and Oxidation behind Reflected Shock Waves
Source: MDPI journal article supplement (doi:10.3390/en14206808), 2021-10-18
Supplement: s1 [file s1]

# An Experimental Kinetics Study of Isopropanol Pyrolysis and Oxidation behind Reflected Shock Waves

Sean P. Cooper, Claire M. Grégoire, Darryl J. Mohr, Olivier Mathieu, Sulaiman A. Alturaifi, and Eric L. Petersen

J. Mike Walker '66 Department of Mechanical Engineering, Texas A&M University, College Station, TX, USA

\*Corresponding Author Email: sean.cooper@tamu.edu

## Supplemental Material Section

### A/ H<sub>2</sub>O laser absorption profiles

#### A.1/ H<sub>2</sub>O laser absorption profiles for pyrolysis

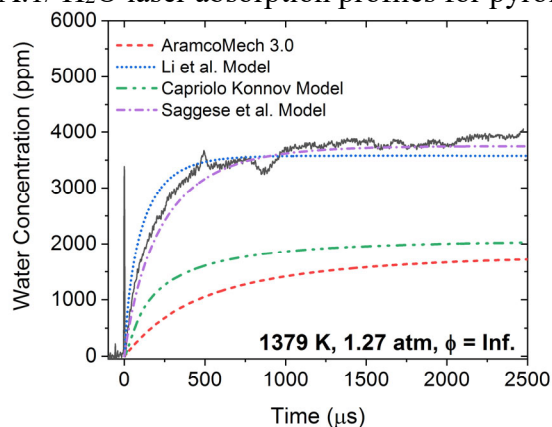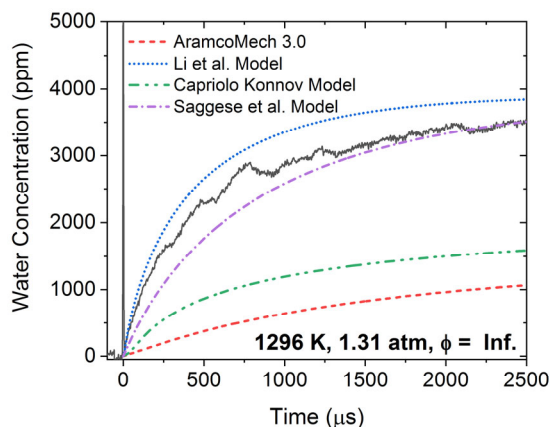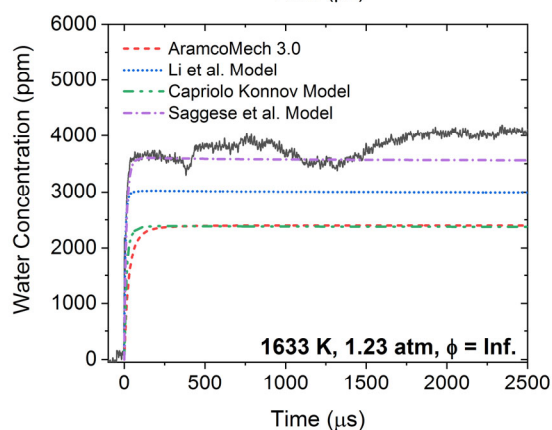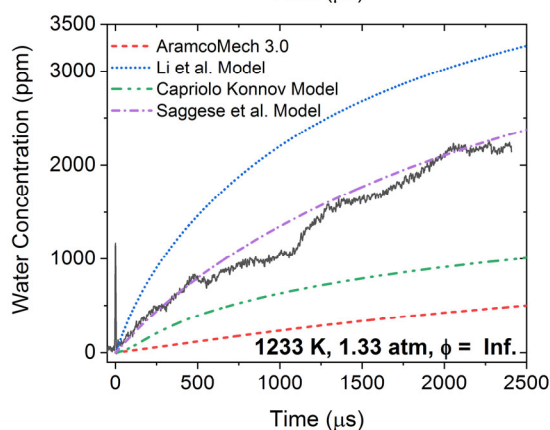

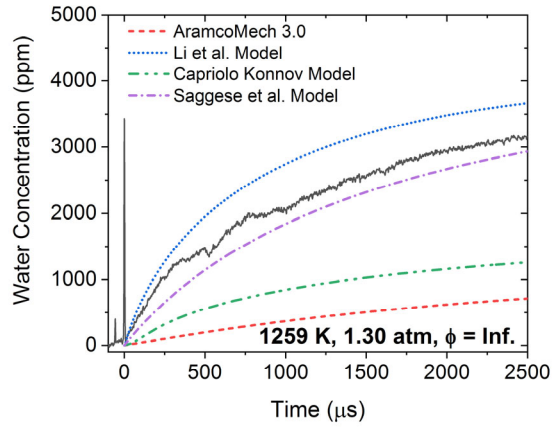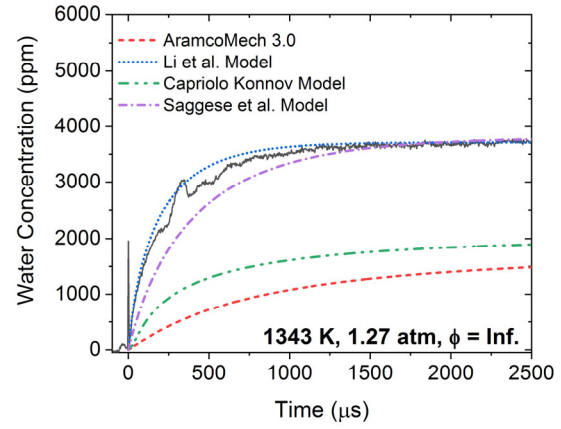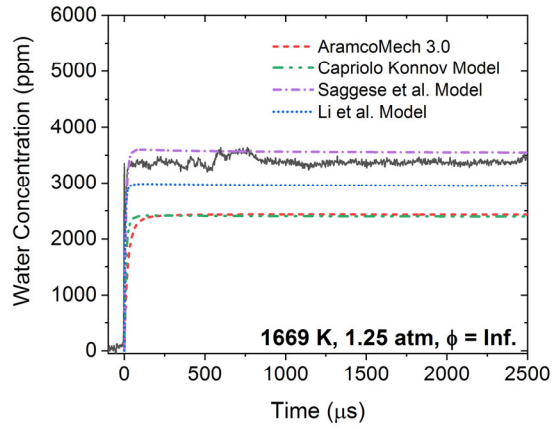

## A.2/ H<sub>2</sub>O laser absorption profiles for $\phi = 0.5$

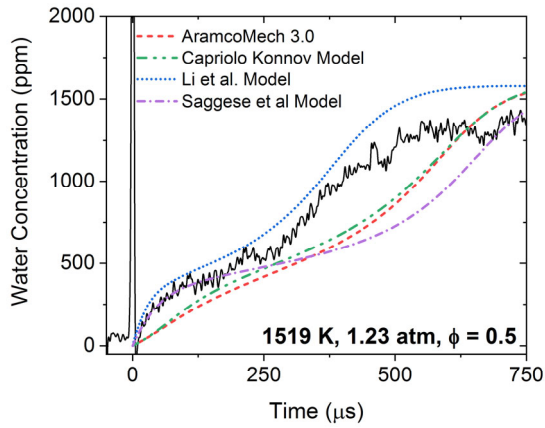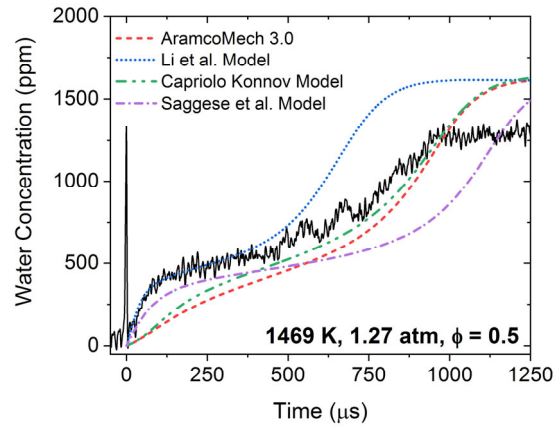

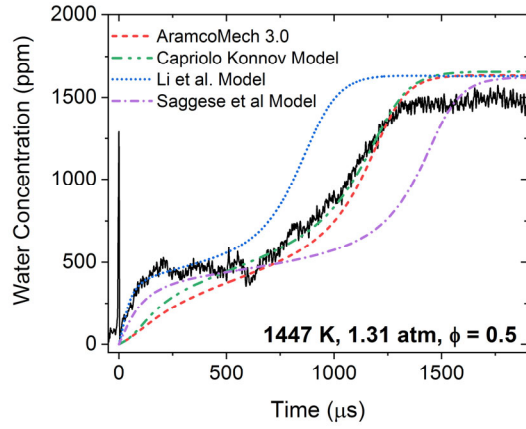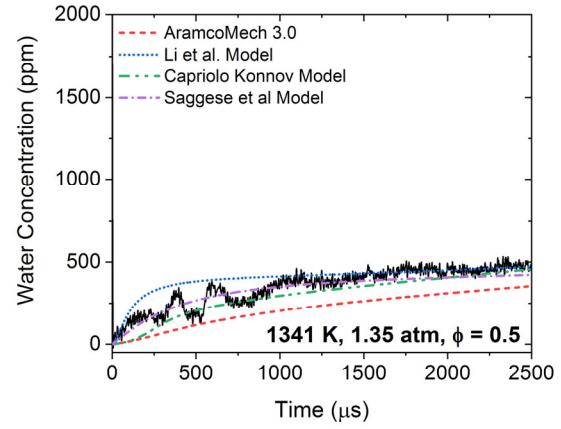

### A.3/ H<sub>2</sub>O laser absorption profiles for $\phi = 1.0$

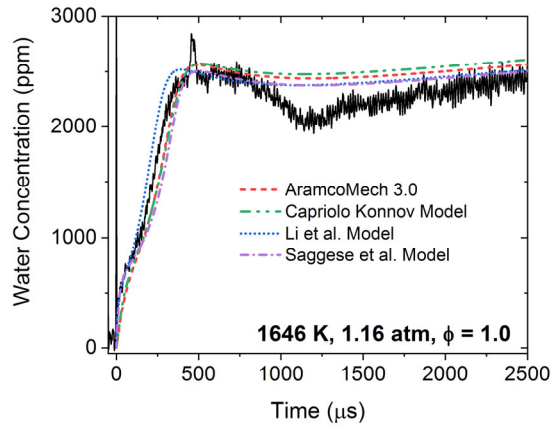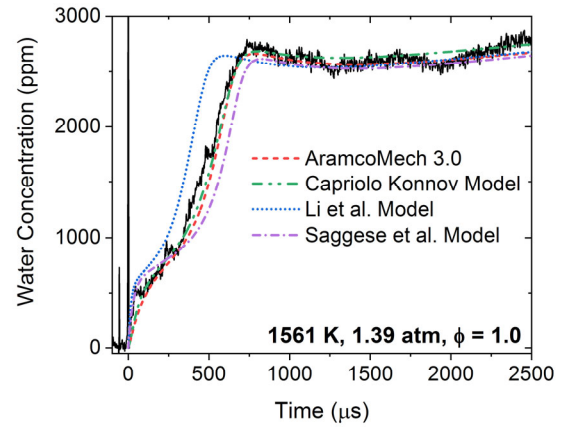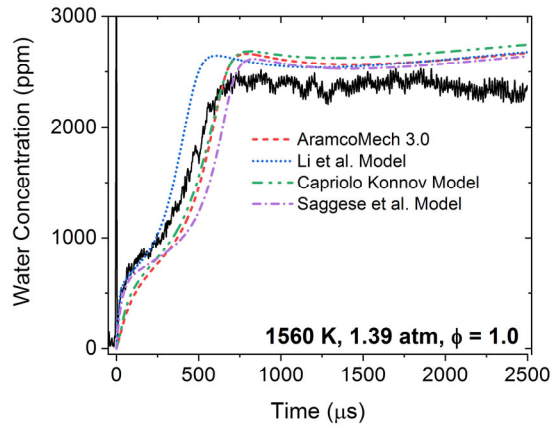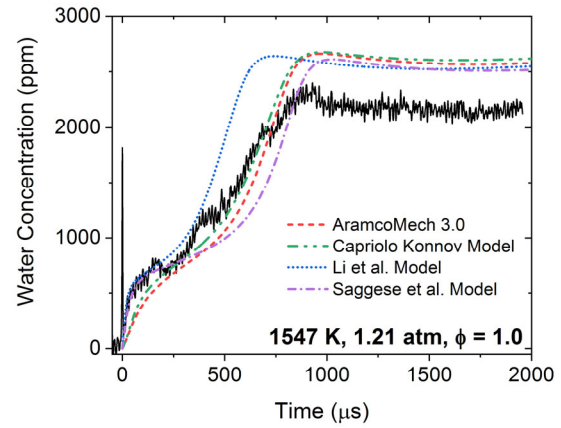

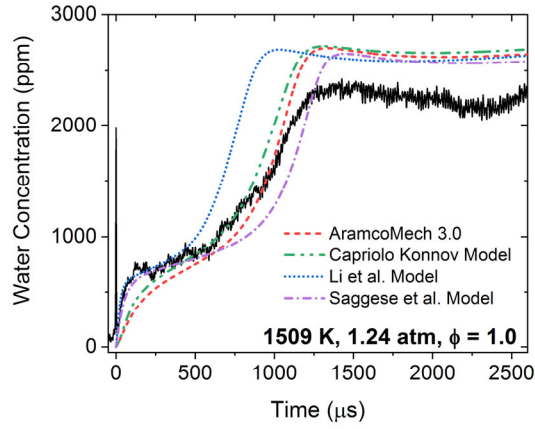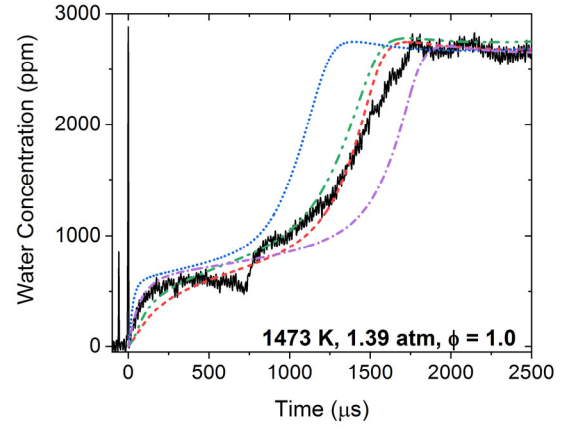

#### A.4/ $\text{H}_2\text{O}$ laser absorption profiles for $\phi = 2.0$

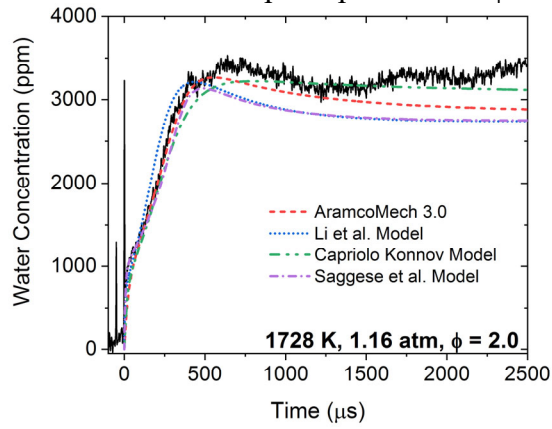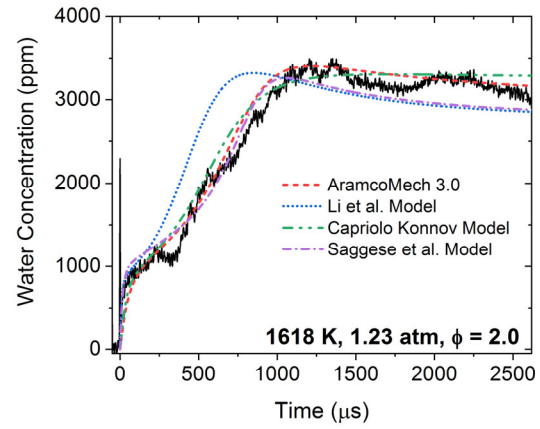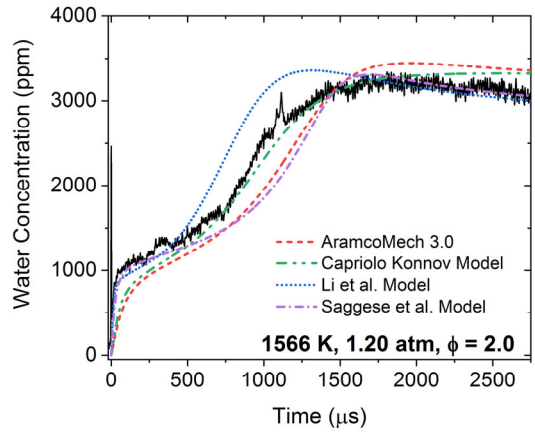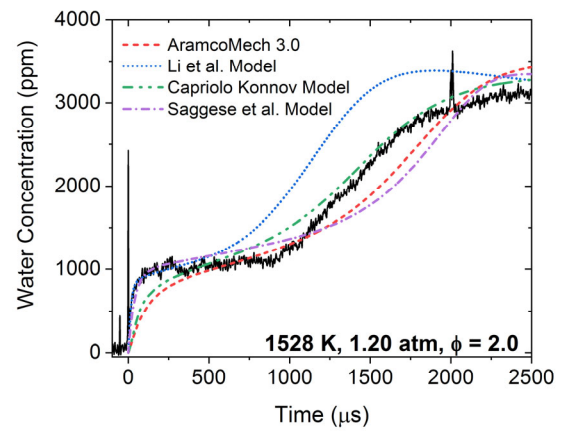

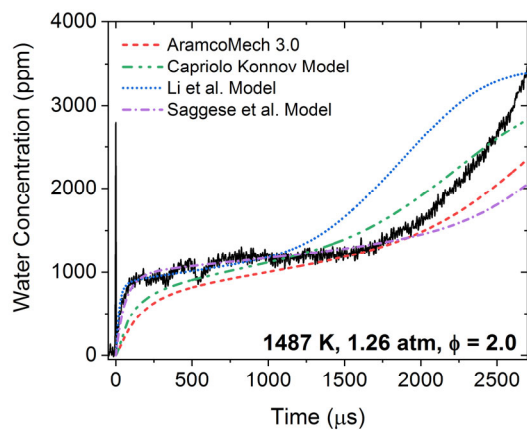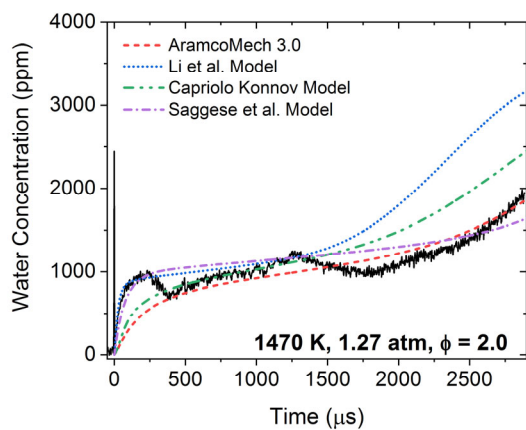

## B/ CO laser absorption profiles

### B.1/ CO laser absorption profiles for pyrolysis

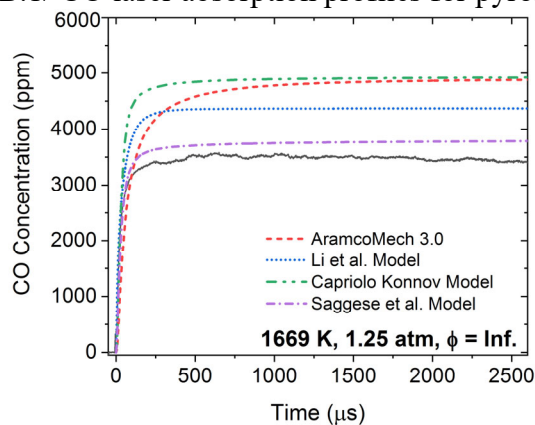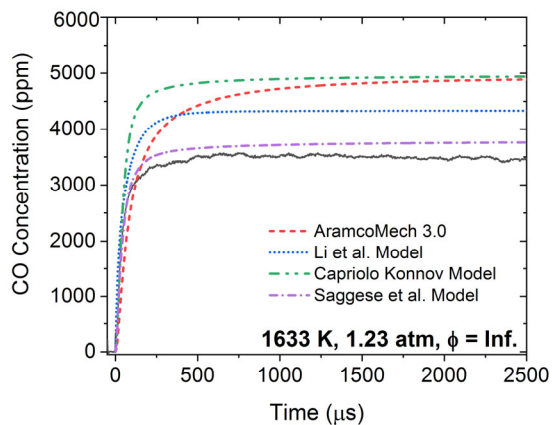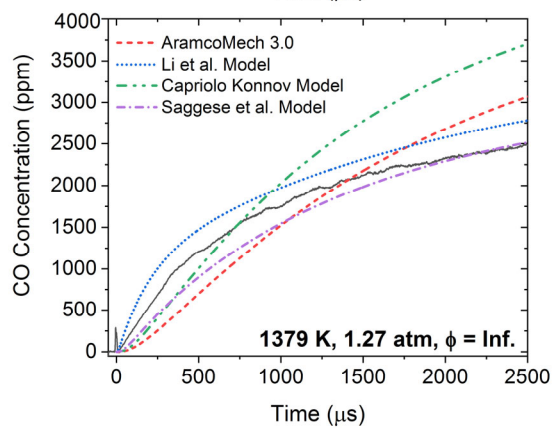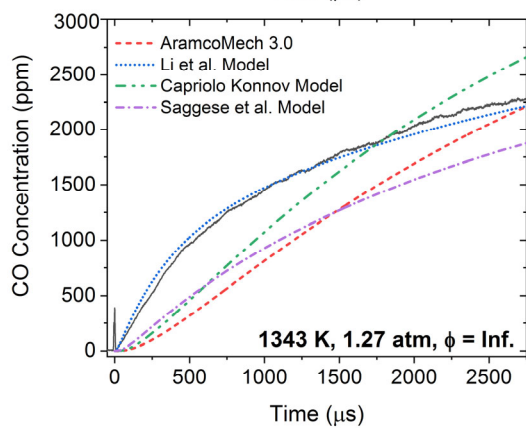



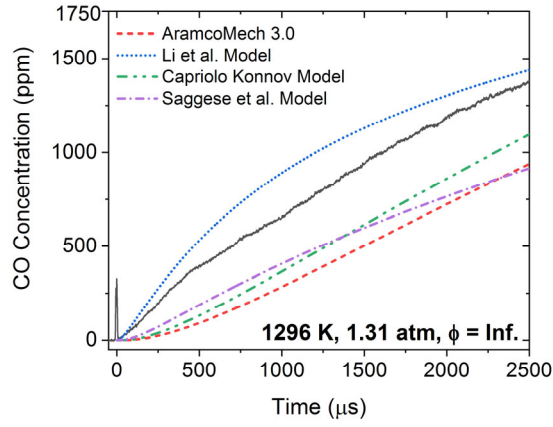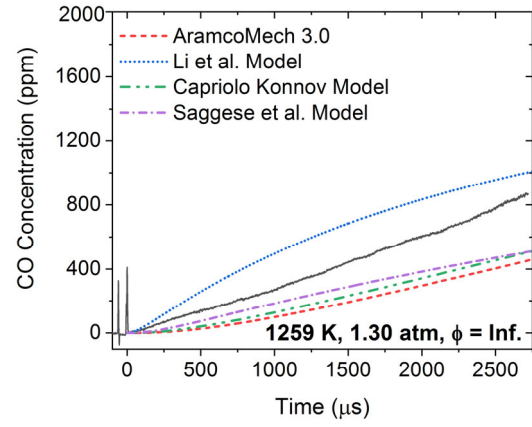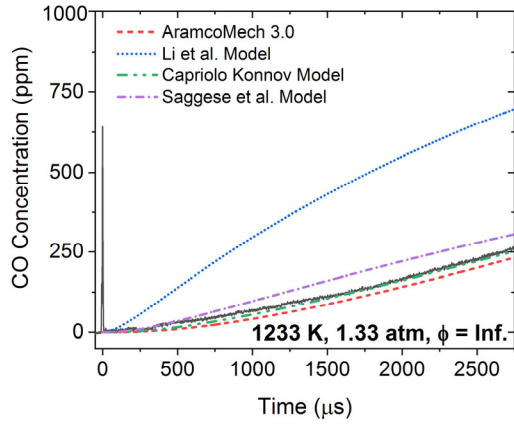

## B.2/ CO laser absorption profiles for $\phi = 0.5$

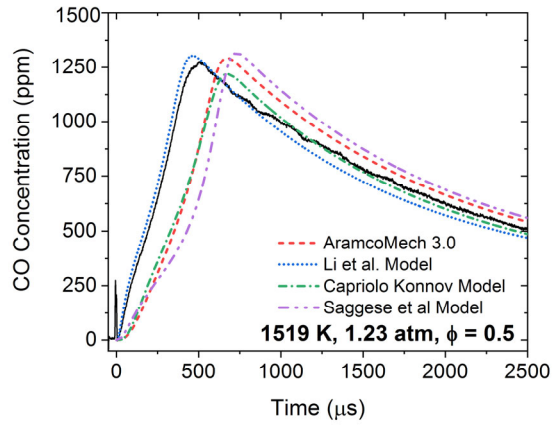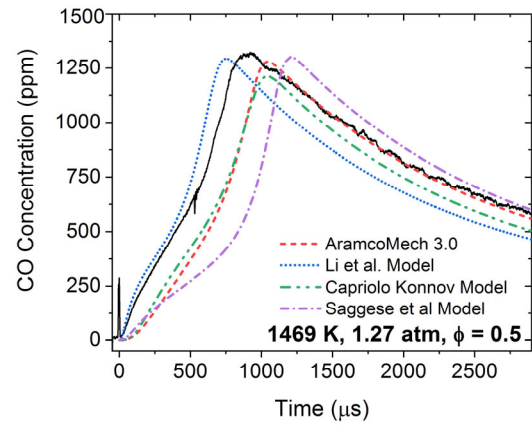

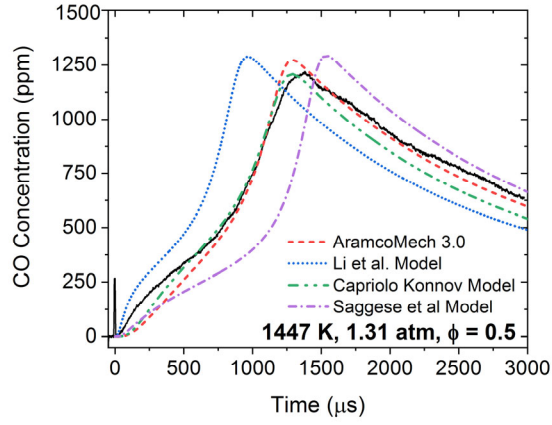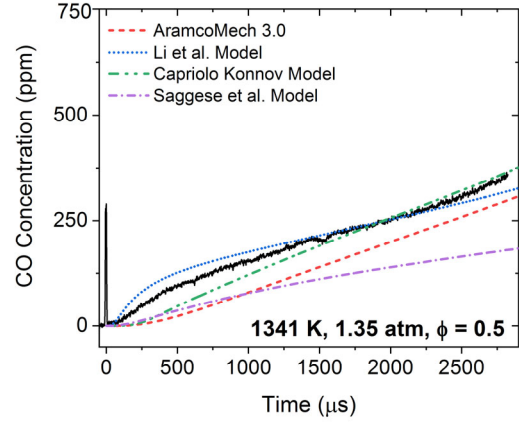

### B.3/ CO laser absorption profiles for $\phi = 1.0$

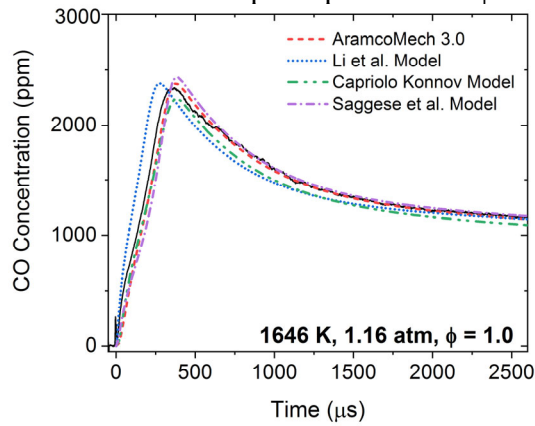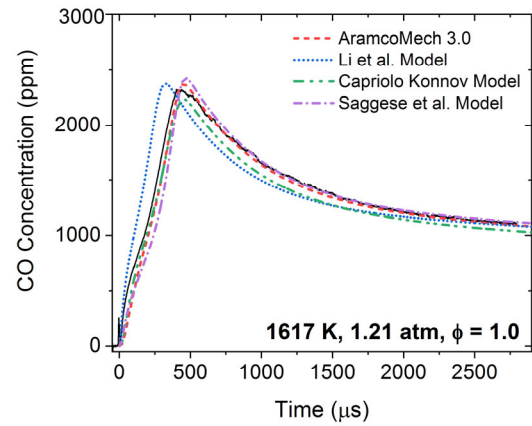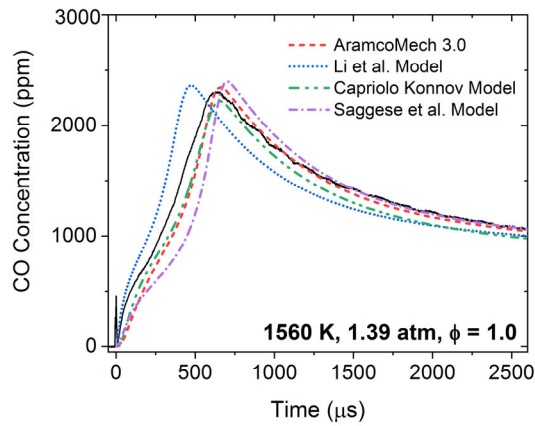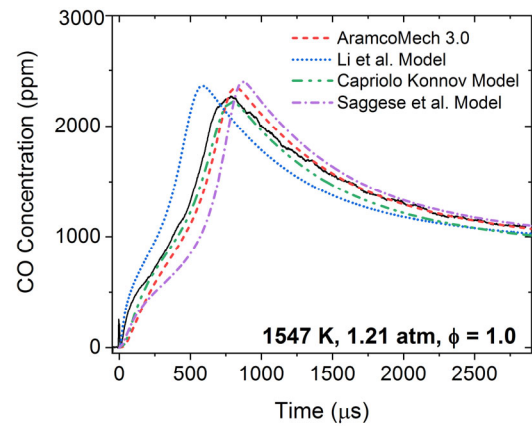

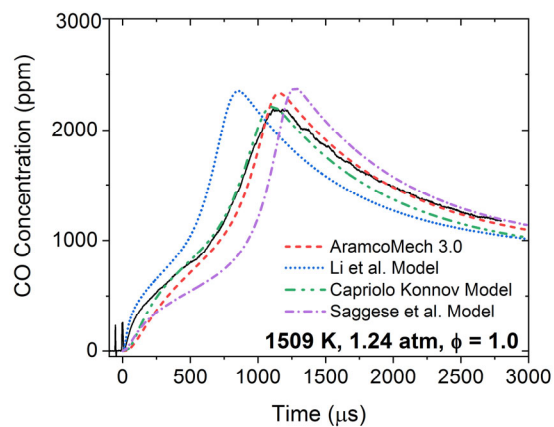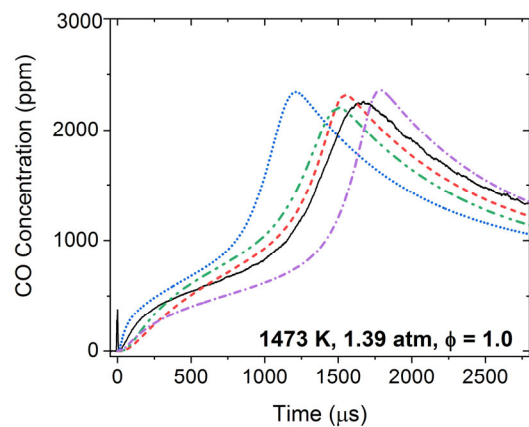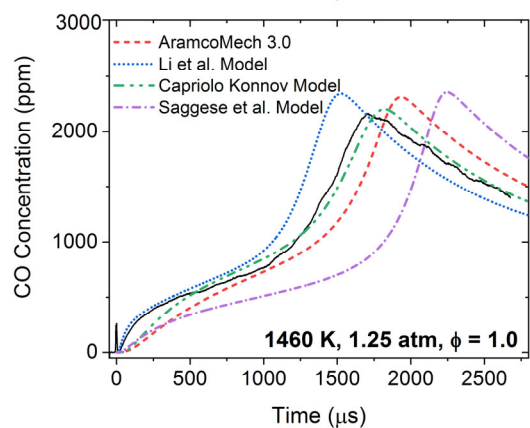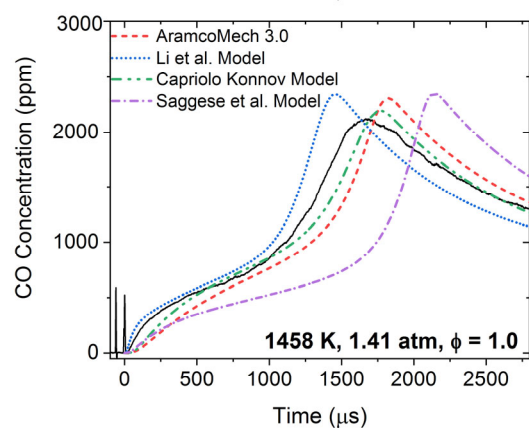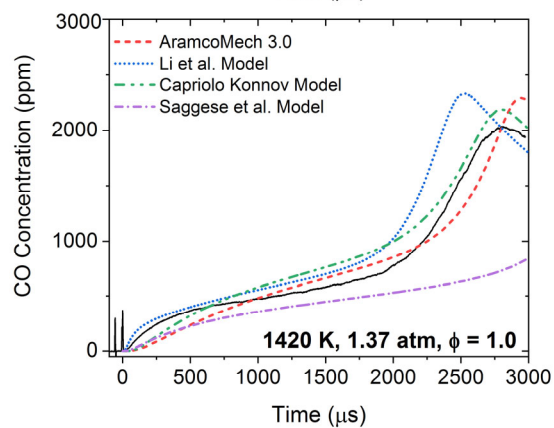



#### B.4/ CO laser absorption profiles for $\phi = 2.0$

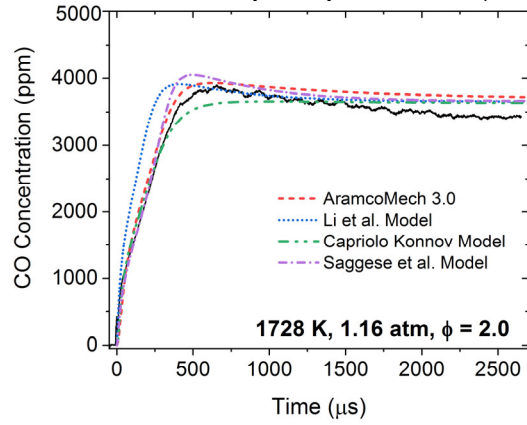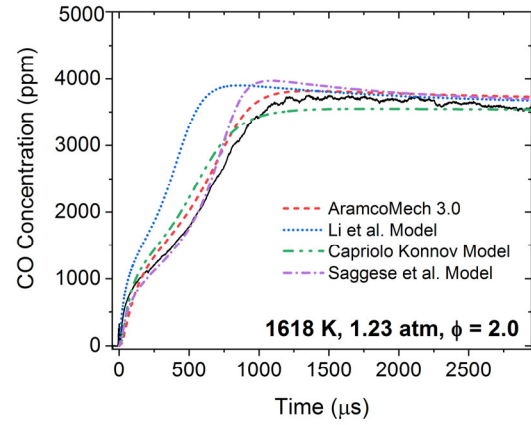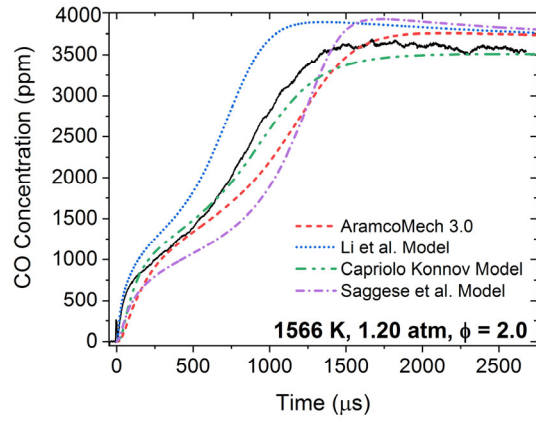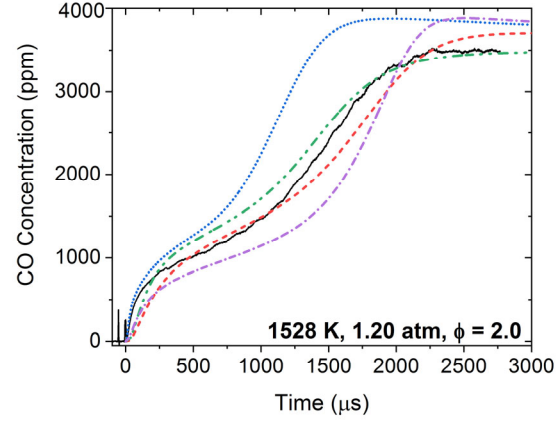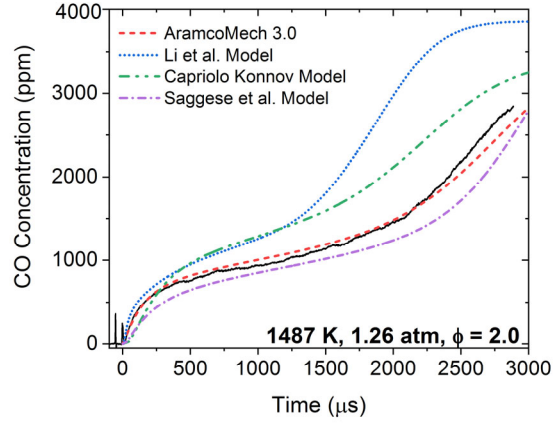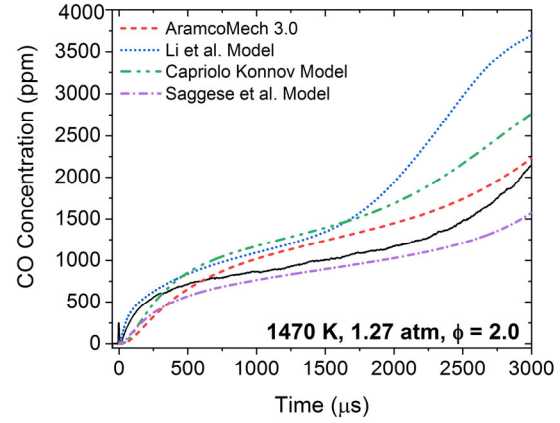

### C/ Ignition delay times

Table S1: Ignition delay time results at 10 atm in stoichiometric and  $\phi = 0.5$ , real fuel-air mixtures 7 and 8.

| $\phi$ | $P_5$ (atm) | $T_5$ (K) | $\tau_{\text{ign}}$ ( $\mu\text{s}$ ) |
|--------|-------------|-----------|---------------------------------------|
| 1.0    | 10.6        | 1022      | 2023                                  |
| 1.0    | 10.4        | 1034      | 1540                                  |
| 1.0    | 10.5        | 1071      | 1048                                  |
| 1.0    | 10.8        | 1128      | 520                                   |
| 1.0    | 9.95        | 1175      | 381                                   |
| 1.0    | 9.35        | 1267      | 184                                   |
| 1.0    | 9.65        | 1370      | 78                                    |
| 1.0    | 8.99        | 1428      | 57                                    |

| $\phi$ | $P_5$ (atm) | $T_5$ (K) | $\tau_{\text{ign}}$ ( $\mu\text{s}$ ) |
|--------|-------------|-----------|---------------------------------------|
| 0.5    | 11.0        | 1068      | 1795                                  |
| 0.5    | 10.8        | 1103      | 1160                                  |
| 0.5    | 10.4        | 1105      | 1080                                  |
| 0.5    | 10.1        | 1115      | 1014                                  |
| 0.5    | 9.94        | 1168      | 550                                   |
| 0.5    | 9.81        | 1206      | 371                                   |
| 0.5    | 9.85        | 1266      | 192                                   |
| 0.5    | 10.1        | 1320      | 105                                   |
| 0.5    | 9.83        | 1410      | 51                                    |

Table S2: Ignition delay time results at 25 atm in stoichiometric and  $\phi = 0.5$ , real fuel-air mixtures 7 and 8.

| $\phi$ | $P_5$ (atm) | $T_5$ (K) | $\tau_{\text{ign}}$ ( $\mu\text{s}$ ) |
|--------|-------------|-----------|---------------------------------------|
| 1.0    | 29.6        | 942       | 2204                                  |
| 1.0    | 28.3        | 984       | 1324                                  |
| 1.0    | 27.2        | 1000      | 1010                                  |
| 1.0    | 26.1        | 1065      | 388                                   |
| 1.0    | 24.9        | 1093      | 330                                   |
| 1.0    | 23.9        | 1128      | 258                                   |
| 1.0    | 24.5        | 1134      | 253                                   |
| 1.0    | 23.3        | 1186      | 150                                   |

| $\phi$ | $P_5$ (atm) | $T_5$ (K) | $\tau_{\text{ign}}$ ( $\mu\text{s}$ ) |
|--------|-------------|-----------|---------------------------------------|
| 0.5    | 26.8        | 995       | 1876                                  |
| 0.5    | 26.8        | 1026      | 1140                                  |
| 0.5    | 26.2        | 1053      | 820                                   |
| 0.5    | 25.8        | 1089      | 555                                   |
| 0.5    | 24.9        | 1115      | 414                                   |
| 0.5    | 23.5        | 1142      | 348                                   |
| 0.5    | 23.1        | 1192      | 211                                   |
| 0.5    | 22.0        | 1244      | 140                                   |
| 0.5    | 21.1        | 1311      | 75                                    |

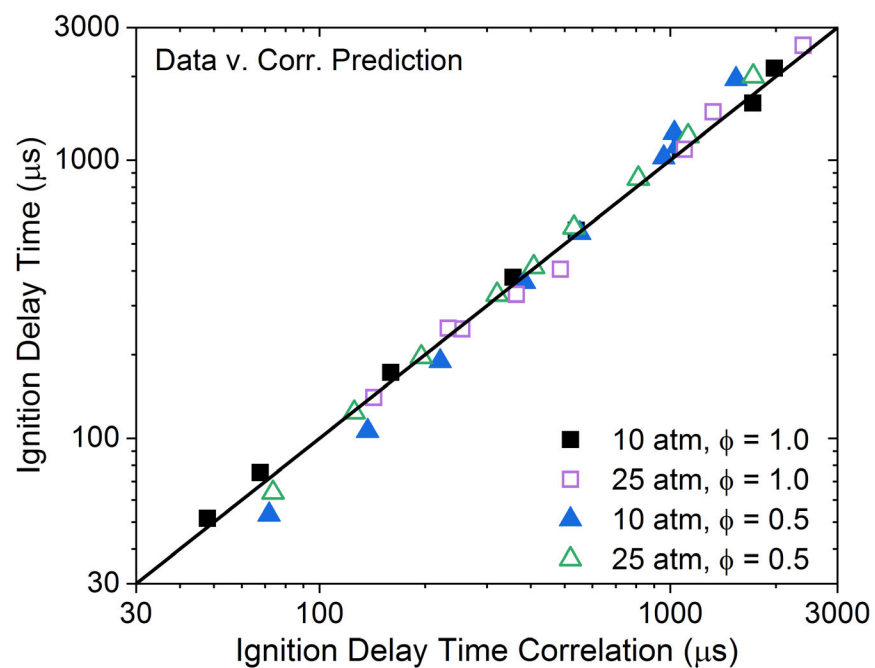

Figure S1: Comparison of ignition delay time measurements to the predictions of the correlation presented in the manuscript.
